# Supplementary material for: Novel Salinity-Tolerant Third-Generation Hybrid Rice Developed via CRISPR/Cas9-Mediated Gene Editing
Source: MDPI journal article supplement (doi:10.3390/ijms24098025), 2023-04-28
Supplement: s1 [file s1]

## Supplementary Materials

**Supplementary Table S1.** Primers used in this study.

| Primer Name | Base Sequence (5'→3')                      | Purpose                                    |
|-------------|--------------------------------------------|--------------------------------------------|
| 22KT1-F     | GGCACATGGCGCGCACGCACGTA                    | Construction of 22KT1 target site          |
| 22KT1-R     | AAACTACGTGCGTGCGCGCCATG                    | Construction of 22KT1 target site          |
| 22KT2-F     | GCCGCGCCATGTCGTCCGCCGCT                    | Construction of 22KT2 target site          |
| 22KT1-R     | GGCACATGGCGCGCACGCACGTA                    | Construction of 22KT2 target site          |
| 22T3-F      | GGCACACGTACCACCAAATGCTA                    | Construction of 22T3 target site           |
| 22T3-R      | AAACTAGCATTGTTGGTGGTACGTG                  | Construction of 22T3 target site           |
| U-F         | AAACTACGTGCGTGCGCGCCATG                    | U#-T-gRNA expression-box first PCR         |
| gRNA-R      | GCCGCGCCATGTCGTCCGCCGCT                    | U#-T-gRNA expression-box first PCR         |
| B1'         | TTCAGAGGTCTCTCTCGCACTGGAA<br>TCGGCAGCAAAGG | U#-T-gRNA expression-box second PCR        |
| B2          | AGCGTGGGTCTCGTCAGGGTCCATC<br>CACTCCAAGCTC  | U#-T-gRNA expression-box second PCR        |
| B2'         | TTCAGAGGTCTCTCTGACACTGGAA<br>TCGGCAGCAAAGG | U#-T-gRNA expression-box second PCR        |
| BL          | AGCGTGGGTCTCGACCGGGTCCATC<br>CACTCCAAGCTC  | U#-T-gRNA expression-box second PCR        |
| SP1         | CCCGACATAGATGCAATAACTTC                    | CRISPR/Cas9 expression-vector verification |
| SP2         | GCGCGGTGTCATCTATGTTACT                     | CRISPR/Cas9 expression-vector verification |
| HPT-F1      | CTTCTGCGGGCGATTTGT                         | Transgenic plant detection                 |
| HPT-R1      | CAGCGTCTCCGACCTGAT                         | Transgenic plant detection                 |
| Cas9-F1     | GTTGGTATTACGGGGTGCCT                       | Transgenic plant detection                 |
| Cas9-R1     | CGACGATGTTGCCGAAGATGG                      | Transgenic plant detection                 |
| RR-CJ3F     | GGATCAGCTGTTGTGTAAAAATGTC                  | 22KT12,22T3 target mutation detection      |
| RR-CJ3R     | CTTGCAACATTTTCCCTGGTGAG                    | 22KT12,22T3 target mutation detection      |

**Supplementary Table S2.** CRISPR/Cas9-induced mutations in *OsRR22* and Transgene-free ratio in T1 generation.

| T0 Plant | Target Site | Host Cultivar | No. of Plants Examined | Transgene-Free Ratio (%) in T1 |
|----------|-------------|---------------|------------------------|--------------------------------|
| T1430    | 22KT12      | 733B          | 18                     | 33.33 (6/18)                   |
| T1431    | 22KT12      | 733B          | 18                     | 27.78 (5/18)                   |
| T1432    | 22KT12      | 733B          | 18                     | 0 (0/18)                       |
| T1447    | 22KT12      | 733B          | 18                     | 16.67 (3/18)                   |
| T1448    | 22KT12      | 733B          | 18                     | 22.23 (4/18)                   |
| T1347    | 22T3        | HZ            | 18                     | 11.12 (2/18)                   |
| T1348    | 22T3        | HZ            | 18                     | 0 (0/18)                       |
| T1349    | 22T3        | HZ            | 18                     | 27.78 (5/18)                   |
| T1350    | 22T3        | HZ            | 18                     | 27.78 (5/18)                   |
| T1351    | 22T3        | HZ            | 18                     | 16.67 (3/18)                   |

**Supplementary Table S3.** Mutation detections in the putative CRISPR/Cas9 off-target sites.

| Target Site | Putative Off-Target Site | Putative Off-Target Locus | Sequence of Putative Off-Target Site <sup>1</sup> | No. of Mismatching Bases | No. of Plants Detected | No. of Plants with Mutations |
|-------------|--------------------------|---------------------------|---------------------------------------------------|--------------------------|------------------------|------------------------------|
| 22KT1       | off-22KT1-1              | Chr11:1220469-1220488     | TGATTAAAGAACCACAGAA <u>AGG</u>                    | 4                        | 90                     | 0                            |
| 22KT1       | off-22KT1-2              | Chr11:14999083-14999102   | TTCTTAGAAGAATCACAGGT <u>AGG</u>                   | 4                        | 90                     | 0                            |
| 22KT1       | off-22KT1-3              | Chr11:4021308-4021327     | TGCTCAGAAGATCCACAGTT <u>AGG</u>                   | 3                        | 90                     | 0                            |
| 22KT1       | off-22KT1-4              | Chr11:8539864-8539883     | TTAGCAGCAGCACCACAGGT <u>TGG</u>                   | 4                        | 90                     | 0                            |
| 22KT2       | off-22KT2-1              | Chr3:35790995-35791014    | CTGGGCTCTTATGCAGCAGA <u>TGG</u>                   | 4                        | 90                     | 0                            |
| 22KT2       | off-22KT2-2              | Chr3:12627682-12627701    | CCTCTCTTCTTTGCAGCTGA <u>TGG</u>                   | 4                        | 90                     | 0                            |
| 22T3        | off-22T3-1               | Chr7:22781210-22781229    | TGACAATGAATCTGATGAAG <u>AGG</u>                   | 4                        | 90                     | 0                            |
| 22T3        | off-22T3-2               | Chr1:33054780-33054799    | TGACCAAGGACGTGATGAAG <u>GGG</u>                   | 5                        | 90                     | 0                            |
| 22T3        | off-22T3-3               | Chr1:32373735-32373754    | AGTCAAAGACTGTGAGGAAA <u>GGG</u>                   | 4                        | 90                     | 0                            |
| 22T3        | off-22T3-4               | Chr1:32373735-32373754    | AGACCAA <sup>1</sup> ACTGTATTGAAG <u>GGG</u>      | 4                        | 90                     | 0                            |

<sup>1</sup>The base that matched the sgRNA are marked in black. The base that mismatched the sgRNA are marked in red. The sequences of the PAM are underlined.
